# Supplementary material for: Deep sequencing uncovers commonality in small RNA profiles between transgene-induced and naturally occurring RNA silencing of chalcone synthase-A gene in petunia
Source: PubMed Central journal article supplement (PMC3608071; doi:10.1186/1471-2164-14-63), 2013-01-30
Supplement: 1471-2164-14-63-S1.pdf [file 1471-2164-14-63-S1.pdf]

a

## J-w sense strand

| Rank | Read number | Nucleotide sequence (5' to 3') | Position    |
|------|-------------|--------------------------------|-------------|
| 1    | 2031        | UUUUGGAUGAAAUGAGAAAGGC         | 3606 → 3627 |
| 2    | 900         | CUUUUGUUCGAGCUCGUUUCAGC        | 3276 → 3297 |
| 3    | 524         | AAGAAGGUUUAGGAACUACUGG         | 3636 → 3657 |
| 4    | 468         | UUUGGAUGAAAUGAGAAAGGCC         | 3607 → 3628 |
| 5    | 353         | UUGGAACUCUCUAUUCUGGAUU         | 3454 → 3475 |
| 6    | 232         | UUCGGUUAGCCAAGGACUUGGC         | 3084 → 3105 |
| 7    | 177         | CAUUUGGAUAGUUUAGUUGGCC         | 3185 → 3206 |
| 8    | 169         | UUAGGAACUACUGGUGAAGGCC         | 3644 → 3665 |
| 9    | 168         | UGUUCGAGCUCGUUUCAGCAGC         | 3279 → 3300 |
| 10   | 168         | UUGGACCAAGUUGAAUAAAGU          | 3500 → 3521 |

## R-w sense strand

| Rank | Read number | Nucleotide sequence (5' to 3') | Position    |
|------|-------------|--------------------------------|-------------|
| 1    | 1277        | UUUUGGAUGAAAUGAGAAAGGC         | 3606 → 3627 |
| 2    | 463         | CUUUUGUUCGAGCUCGUUUCAGC        | 3276 → 3297 |
| 3    | 202         | UUGGAACUCUCUAUUCUGGAUU         | 3454 → 3475 |
| 4    | 192         | AAGAAGGUUUAGGAACUACUGG         | 3636 → 3657 |
| 5    | 184         | GGCAUUUCUGAUUGGAACUCUC         | 3443 → 3464 |
| 6    | 159         | UUUGGAUGAAAUGAGAAAGGCC         | 3607 → 3628 |
| 7    | 134         | AAUAAAAGUUGGGCCUAAAGCC         | 3513 → 3534 |
| 8    | 110         | UUGGACCAAGUUAAAUAAGU           | 3500 → 3521 |
| 9    | 85          | CAAAGAUGUUCUGGGCUGAUC          | 3376 → 3397 |
| 10   | 83          | UGUUCGAGCUCGUUUCAGCAGC         | 3279 → 3300 |

b

## J-w antisense strand

| Rank | Read number | Nucleotide sequence (5' to 3') | Position    |
|------|-------------|--------------------------------|-------------|
| 1    | 13486       | UGAAACGAGCUCGAACAAAGGC         | 3274 → 3295 |
| 2    | 9274        | UCUGAACAAACAACAAGGACUC         | 3126 → 3147 |
| 3    | 4835        | GGAGAAGAGUUUGGGCUGCUGA         | 3293 → 3314 |
| 4    | 1964        | UUUGAGUAAGUGGAAUGUAAGC         | 3358 → 3379 |
| 5    | 1563        | UUGGCUAACCGAAGAACCUGUC         | 3075 → 3096 |
| 6    | 1436        | CUGAAACGAGCUCGAACAAAGG         | 3275 → 3296 |
| 7    | 788         | ACCGCGGUGAUUUCUGAACAAA         | 3138 → 3159 |
| 8    | 594         | UGCUGAAACGAGCUCGAACAAA         | 3277 → 3298 |
| 9    | 422         | UGACCGCGGUGAUUUCUGAACAA        | 3140 → 3161 |
| 10   | 419         | UUAAGUUUCUCGGGCUUAGGC          | 3525 → 3546 |

## R-w antisense strand

| Rank | Read number | Nucleotide sequence (5' to 3') | Position    |
|------|-------------|--------------------------------|-------------|
| 1    | 8199        | UGAAACGAGCUCGAACAAAGGC         | 3274 → 3295 |
| 2    | 2273        | UCUGAACAAACAACAAGGACUC         | 3126 → 3147 |
| 3    | 1051        | UUUGAGUAAGUGGAAUGUAAGC         | 3358 → 3379 |
| 4    | 805         | UAGCAACACUGUGGAGGACAAC         | 3716 → 3737 |
| 5    | 647         | CUGAAACGAGCUCGAACAAAGG         | 3275 → 3296 |
| 6    | 431         | UUGGCUAACCGAAGAACCUGUC         | 3075 → 3096 |
| 7    | 412         | GGAGAAGAGUUUGGGCUGCUGA         | 3293 → 3314 |
| 8    | 369         | UGCUGAAACGAGCUCGAACAAA         | 3277 → 3298 |
| 9    | 188         | ACCGCGGUGAUUUCUGAACAAA         | 3138 → 3159 |
| 10   | 182         | UUAAGUUUCUCGGGCUUAGGC          | 3525 → 3546 |
