# Supplementary material for: Deep sequencing uncovers commonality in small RNA profiles between transgene-induced and naturally occurring RNA silencing of chalcone synthase-A gene in petunia
Source: PubMed Central journal article supplement (PMC3608071; doi:10.1186/1471-2164-14-63), 2013-01-30

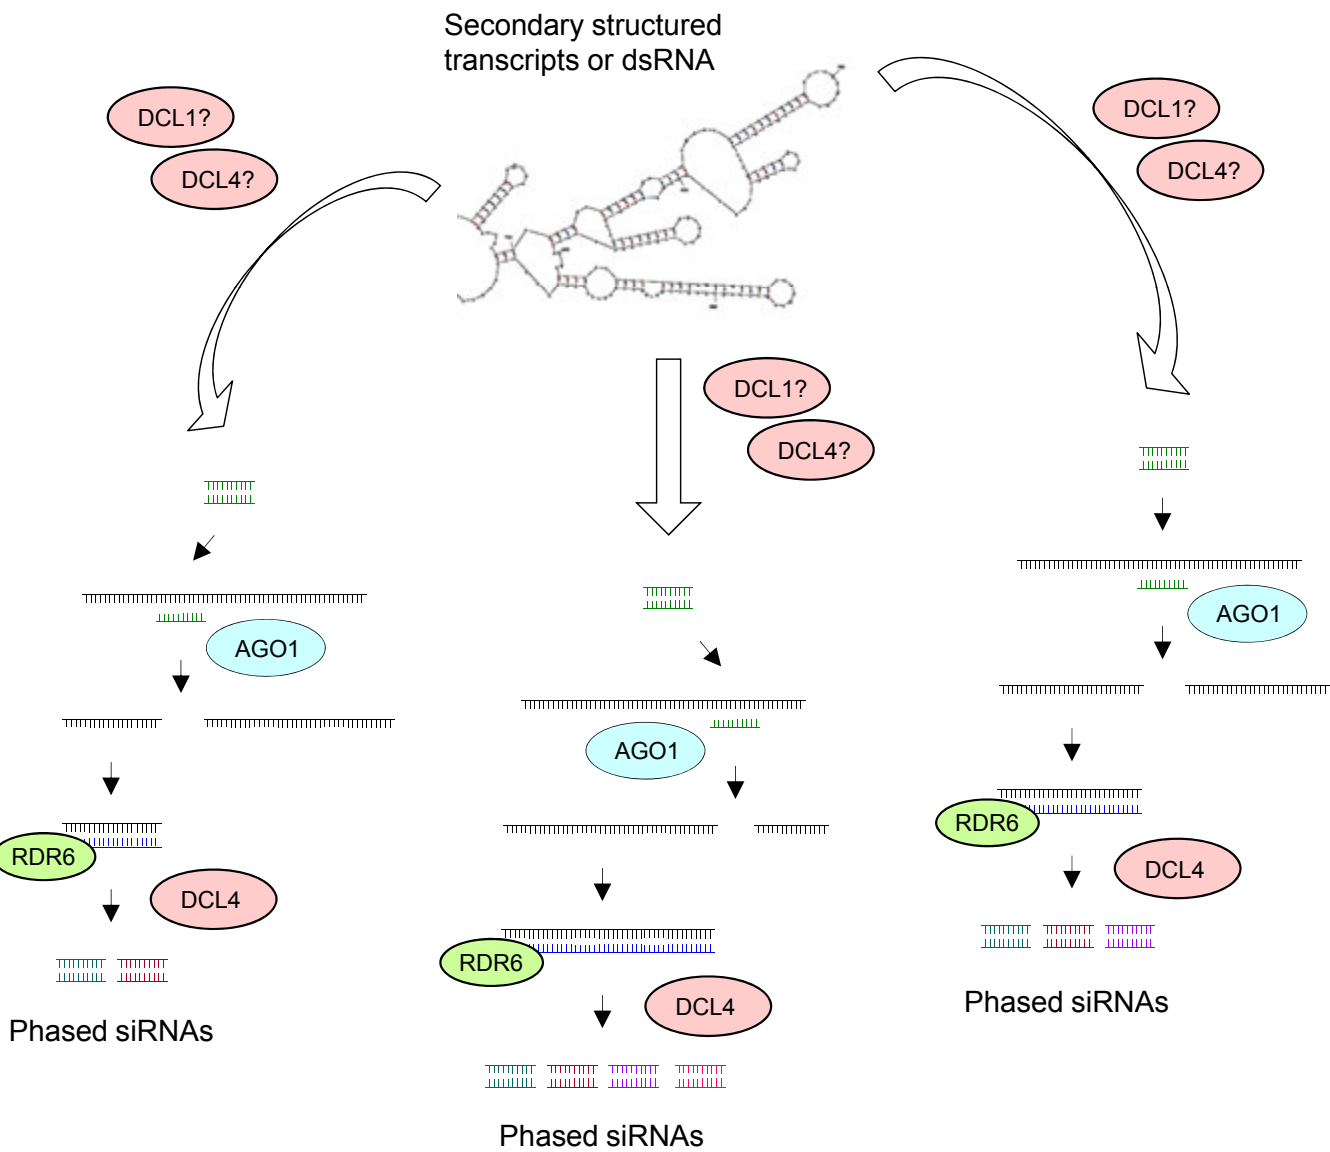

Supplement: 1471-2164-14-63-S2.pdf [file 1471-2164-14-63-S2.pdf]
