# Supplementary material for: Deep sequencing uncovers commonality in small RNA profiles between transgene-induced and naturally occurring RNA silencing of chalcone synthase-A gene in petunia
Source: PubMed Central journal article supplement (PMC3608071; doi:10.1186/1471-2164-14-63), 2013-01-30
Supplement: 1471-2164-14-63-S3.pdf [file 1471-2164-14-63-S3.pdf]

a

## Sense strand

J-w

R-w

3608-3628 (1)  
3607-3627 (3)  
3606-3626 (15)

3607-3627 (2)  
3608-3628 (3)  
3606-3626 (14)

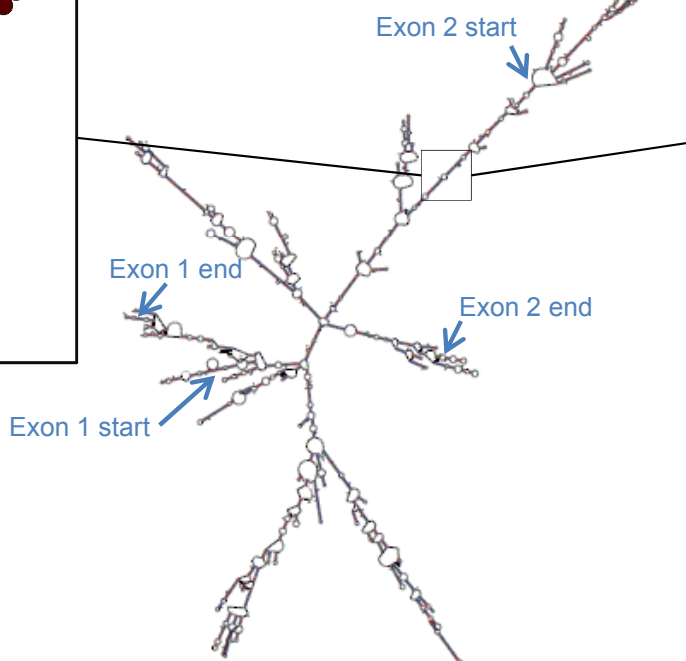

|               |   |
|---------------|---|
| 1001 - 2000   | ○ |
| 2001 - 4000   | ○ |
| 4001 - 6000   | ○ |
| 6001 - 8000   | ○ |
| 8001 - 10000  | ○ |
| 10001 - 50000 | ○ |

b

## Antisense strand

J-w

R-w

3126-3146 (1)  
3127-3147 (6)  
3120-3140 (9)  
3139-3159 (10)  
3125-3145 (11)  
3129-3149 (12)  
3138-3158 (18)

3126-3146 (1)  
3120-3140 (4)  
3127-3147 (5)  
3139-3159 (11)  
3129-3149 (12)  
3125-3145 (21)  
3138-3158 (23)

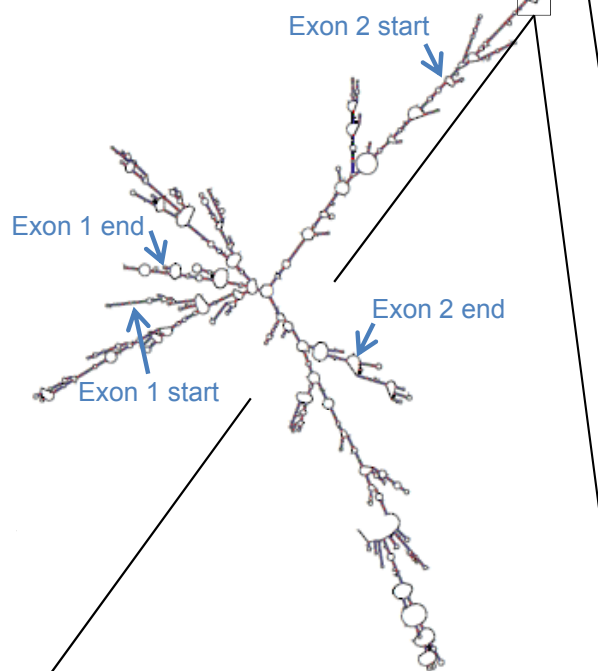

3293-3313 (2)  
3273-3293 (3)  
3296-3316 (4)  
3275-3295 (5)  
3274-3294 (7)  
3294-3314 (13)  
3284-3304 (19)  
3285-3305 (23)

3275-3295 (2)  
3273-3293 (3)  
3274-3294 (7)  
3285-3305 (8)  
3286-3306 (13)  
3284-3304 (14)  
3293-3313 (15)  
3276-3296 (17)  
3278-3298 (25)
